# Supplementary material for: Preparation of cellulose-rich membranes from wood: effect of wood pretreatment process on membrane performance
Source: Springer Nature journal article supplement (doi:10.1007/s10570-020-03430-0), 2020-09-14
Supplement: MOESM1 [file 18378846]

## Supplementary material

# Preparation of cellulose-rich membranes from wood: Effect of wood pretreatment process on membrane performance

Anastasiia Lopatina<sup>1</sup>, Ikenna Anugwom<sup>2</sup>, Mohammadamin Esmaeili<sup>1</sup>, Liisa Puro<sup>1</sup>, Tiina Virtanen<sup>1</sup>, Mika Mänttari<sup>1</sup>, Mari Kallioinen<sup>1</sup>

<sup>1</sup> Department of Separation Science, LUT School of Engineering Science, LUT University, P.O. Box 20, FI-53851 Lappeenranta, Finland;

<sup>2</sup> LUT Re-Source Research Platform, LUT University, P.O. Box 20, FI-53851 Lappeenranta, Finland.

Corresponding author: Anastasiia Lopatina (Anastasiia.Lopatina@lut.fi)

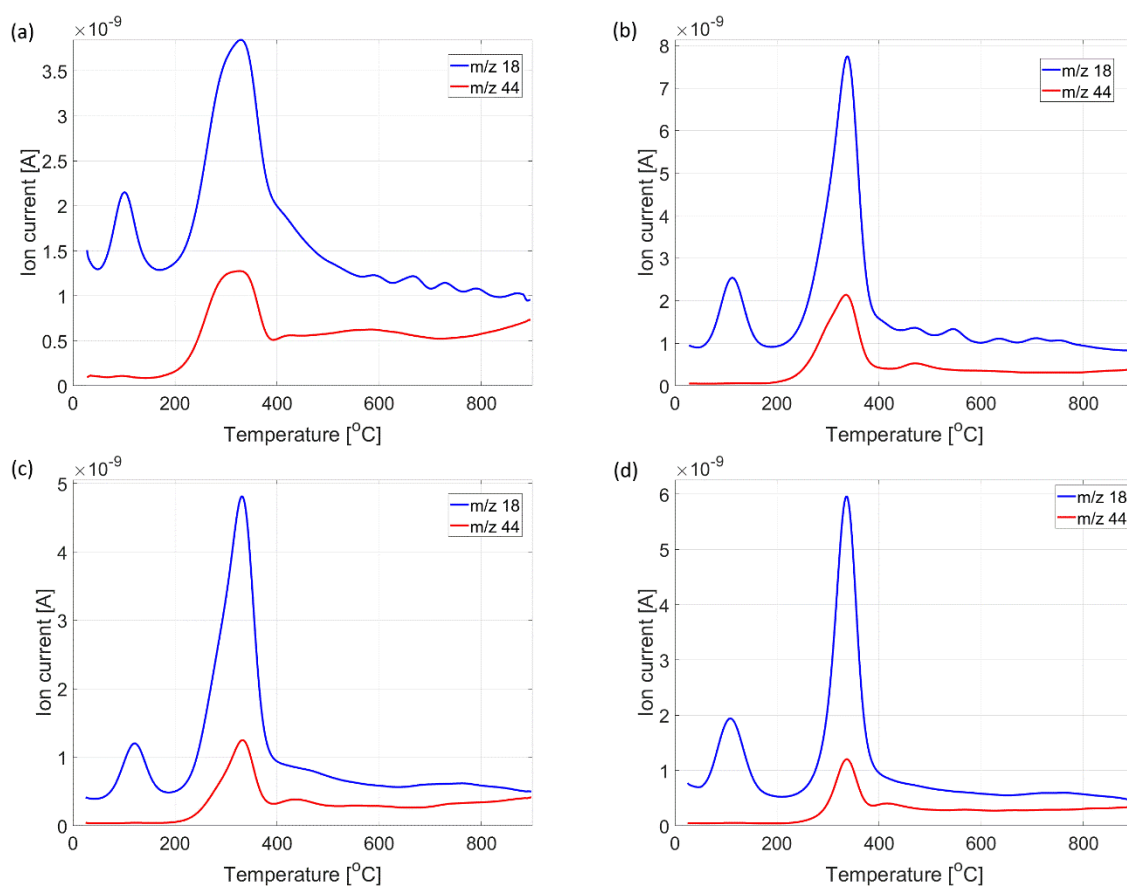

**Fig S1** Evolution of  $\text{H}_2\text{O}$  ( $m/z$  18) and  $\text{CO}_2$  ( $m/z$  44) for membrane samples prepared from untreated birch (a), DES treated birch (b), DES treated and bleached birch (c), and alkaline-treated bleached DES-treated birch (d)

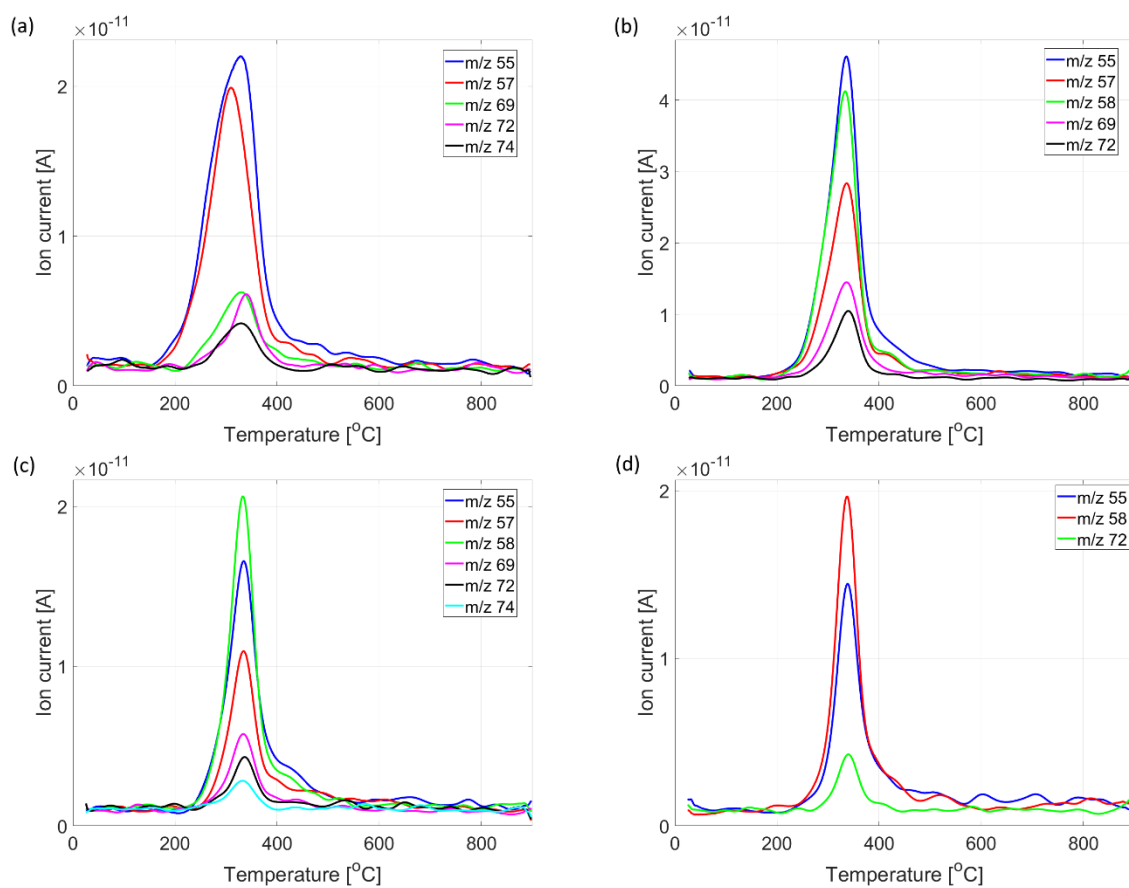

**Fig S2** Selected MS ion intensity curves of membrane samples prepared from untreated birch (a), DES treated birch (b), DES treated and bleached birch (c), and alkaline-treated bleached DES-treated birch (d)

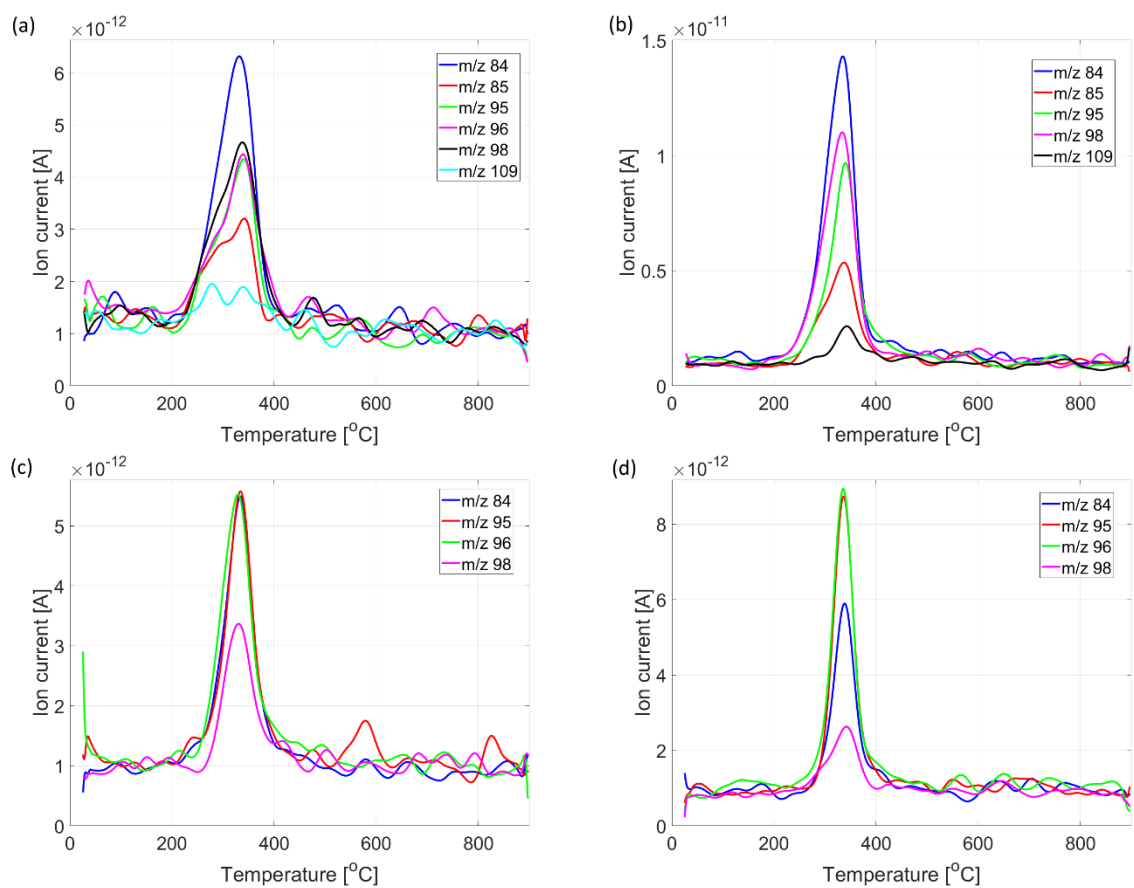

**Fig S3** Selected MS ion intensity curves of membrane samples prepared from untreated birch (a), DES treated birch (b), DES treated and bleached birch (c), and alkaline-treated bleached DES-treated birch (d)
